# Supplementary material for: Solvent and cosolute dependence of Mg surface enrichment in submicron aerosol particles
Source: Royal Society of Chemistry journal article supplement (doi:10.1039/d1cp04953d), 2022-01-01
Supplement: d1cp04953d1.pdf [file d1cp04953d1.pdf]

## Supplementary information: Solvent and cosolute dependence of Mg surface enrichment in submicron aerosol particles

Eetu Pelimanni<sup>1</sup>, Clara-Magdalena Saak<sup>2,3</sup>, Georgia Michailoudi<sup>1</sup>, Nønne Prisle<sup>1,4</sup>, Marko Huttula<sup>1</sup>,  
and Minna Patanen<sup>1</sup>

<sup>1</sup>Nano and Molecular Systems Research Unit, Faculty of Science, Box 3000, 90014 University of Oulu, Finland.

<sup>2</sup>Department for Physics and Astronomy, Uppsala University, Box 516, 75120 Uppsala, Sweden

<sup>3</sup>University of Vienna, Department of Physical Chemistry, Währinger Straße 42, 1090 Vienna, Austria

<sup>4</sup>Center for Atmospheric Research, Faculty of Information Technology and Electrical Engineering, P. O. Box 4500, 90014 University of Oulu, Finland

### 1 Details of "Method 2"

The number of Ca atoms per each Cl atom ( $X_{Ca}$ ) at the surface of mixed  $CaCl_2/MgCl_2$  particles from solution  $i$  is obtained by normalisation of the peak area ratio to that in pure  $CaCl_2$  reference  $p$  as

$$X_{Ca} = \frac{A_{Ca3p}^i/A_{Cl3s}^i}{A_{Ca3p}^p/A_{Cl3s}^p} \cdot \frac{1}{2}. \quad (1)$$

Similarly, the number of Mg atoms per each Cl atom is

$$X_{Mg} = \frac{A_{Mg2p}^i/A_{Cl3s}^i}{A_{Mg2p}^p/A_{Cl3s}^p} \cdot \frac{1}{2}. \quad (2)$$

The 1/2 multiplications account for the ion stoichiometry. The at% are then

$$\text{at\%}(\text{Ca}) = 100 \cdot \frac{X_{Ca}}{X_{Ca} + X_{Mg} + X_{Cl}}, \quad (3)$$

$$\text{at\%}(\text{Mg}) = 100 \cdot \frac{X_{Mg}}{X_{Ca} + X_{Mg} + X_{Cl}}, \quad (4)$$

and

$$\text{at\%}(\text{Cl}) = 100\% - \text{at\%}(\text{Ca}) - \text{at\%}(\text{Mg}), \quad (5)$$

where  $X_{Cl} = 1$ . Similarly for  $NaBr/MgBr_2$  particles, one has

$$X_{Na} = \frac{A_{Na2p}^i/A_{Br3d}^i}{A_{Na2p}^p/A_{Br3d}^p} \cdot \frac{1}{1} \quad (6)$$

and

$$X_{Mg} = \frac{A_{Mg2p}^i/A_{Br3d}^i}{A_{Mg2p}^p/A_{Br3d}^p} \cdot \frac{1}{2}. \quad (7)$$

Then

$$\text{at\%}(\text{Na}) = 100 \cdot \frac{X_{Na}}{X_{Na} + X_{Mg} + X_{Br}}, \quad (8)$$

$$\text{at\%}(\text{Mg}) = 100 \cdot \frac{X_{Mg}}{X_{Na} + X_{Mg} + X_{Br}}, \quad (9)$$

$$\text{at\%}(\text{Br}) = 100\% - \text{at\%}(\text{Na}) - \text{at\%}(\text{Mg}). \quad (10)$$

## 2 Binding energies

The BEs are plotted in Fig. 1 as a function of the solute mixing ratio, obtained from single peak fits to the spectra, although it is apparent that the photoelectron peaks represent the full structural diversity at the particle surface and more than a single well-defined chemical state is expected. As noted in the main article, direct comparison of the BEs to other reference systems is not straightforward due to potential charging of the particles. We may however note that the observed BEs do not agree with those reported from aqueous solutions even if shifting of the energy scale is allowed for to account for a calibration offset. This indicates that the particle surface structure differs from that of aqueous solutions, which is in line with that the estimated water content is low.

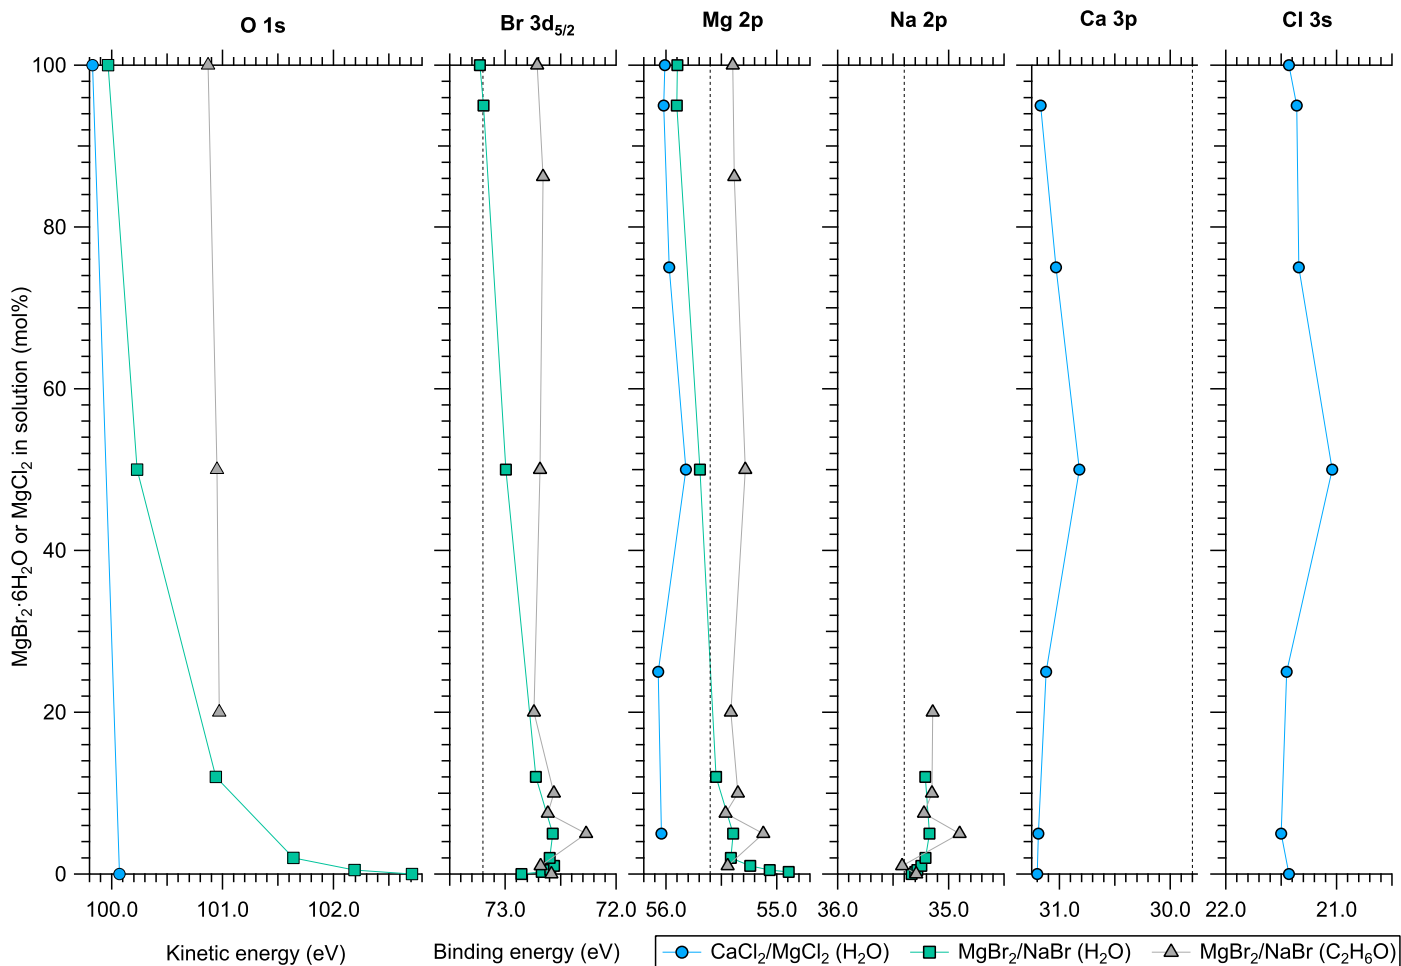

**Figure 1** BEs as a function of the mixing ratio in bulk solution. For comparison, BEs of ions in aqueous solutions are indicated by the dotted lines for Ca<sup>2+</sup> 3p<sup>1</sup>, Mg<sup>2+</sup> 2p<sup>2</sup>, Na<sup>+</sup> 2s<sup>3</sup>, Na<sup>+</sup> 2p<sup>3</sup> and Br<sup>-</sup> 3d<sup>3</sup>. For Cl 3s a range of values has been given (see e.g. Ref. 4 and Refs. therein).

### 3 Details of the prepared solutions

Details of the prepared solutions are given in table 1.

**Table 1** Details of the atomized solutions. Concentrations are calculated using the following molar masses:  $M_{mol}(\text{MgCl}_2) = 95.211 \text{ g/mol}$ ,  $M_{mol}(\text{CaCl}_2 \cdot 2\text{H}_2\text{O}) = 146.98 \text{ g/mol}$ ,  $M_{mol}(\text{MgBr}_2 \cdot 6\text{H}_2\text{O}) = 292.204 \text{ g/mol}$ ,  $M_{mol}(\text{NaBr}) = 102.89 \text{ g/mol}$ . GM = Geometric Mean size and GSD = Geometric Standard Deviation of the number concentration measurement with the SMPS.

| Spec. #    | Solvent                         | Solute 1                             | Solute 1 |             | Solute 2                             | Solute 2 |              | Total |        | GM nm | GSD |
|------------|---------------------------------|--------------------------------------|----------|-------------|--------------------------------------|----------|--------------|-------|--------|-------|-----|
|            |                                 |                                      | mmol/L   | mol%        |                                      | mmol/L   | mol%         | g/L   | mmol/L |       |     |
| 1, 29      | H <sub>2</sub> O                | MgCl <sub>2</sub>                    | 20.96    | <b>100</b>  |                                      |          |              | 2.0   | 20.96  |       |     |
| 2          | H <sub>2</sub> O                | MgCl <sub>2</sub>                    | 19.13    | <b>95</b>   | CaCl <sub>2</sub> ·2H <sub>2</sub> O | 1.01     | <b>5</b>     | 2.0   | 20.15  |       |     |
| 3          | H <sub>2</sub> O                | MgCl <sub>2</sub>                    | 13.85    | <b>75</b>   | CaCl <sub>2</sub> ·2H <sub>2</sub> O | 4.63     | <b>25</b>    | 2.0   | 18.48  |       |     |
| 4          | H <sub>2</sub> O                | MgCl <sub>2</sub>                    | 8.16     | <b>50</b>   | CaCl <sub>2</sub> ·2H <sub>2</sub> O | 8.18     | <b>50</b>    | 2.0   | 16.35  | 180   | 1.8 |
| 5          | H <sub>2</sub> O                | MgCl <sub>2</sub>                    | 3.73     | <b>25</b>   | CaCl <sub>2</sub> ·2H <sub>2</sub> O | 11.18    | <b>75</b>    | 2.0   | 14.91  |       |     |
| 6          | H <sub>2</sub> O                | MgCl <sub>2</sub>                    | 0.70     | <b>5</b>    | CaCl <sub>2</sub> ·2H <sub>2</sub> O | 13.29    | <b>95</b>    | 2.0   | 13.99  |       |     |
| 7, 30      | H <sub>2</sub> O                |                                      |          |             | CaCl <sub>2</sub> ·2H <sub>2</sub> O | 13.76    | <b>100</b>   | 2.0   | 13.76  | 170   | 1.7 |
| 8          | H <sub>2</sub> O                | Pure water                           |          |             |                                      |          |              |       |        |       |     |
| 9          | H <sub>2</sub> O                | MgBr <sub>2</sub> ·6H <sub>2</sub> O | 17.39    | <b>100</b>  |                                      |          |              | 5.1   | 17.39  | 170   | 1.7 |
| 10         | H <sub>2</sub> O                | MgBr <sub>2</sub> ·6H <sub>2</sub> O | 17.40    | <b>95</b>   | NaBr                                 | 0.95     | <b>5</b>     | 5.2   | 18.35  | 170   | 1.7 |
| 11, 32     | H <sub>2</sub> O                | MgBr <sub>2</sub> ·6H <sub>2</sub> O | 12.68    | <b>50</b>   | NaBr                                 | 12.80    | <b>50</b>    | 5.0   | 25.48  | 190   | 1.7 |
| 12, 33     | H <sub>2</sub> O                | MgBr <sub>2</sub> ·6H <sub>2</sub> O | 4.78     | <b>12</b>   | NaBr                                 | 35.03    | <b>88</b>    | 5.0   | 39.81  |       |     |
| 13         | H <sub>2</sub> O                | MgBr <sub>2</sub> ·6H <sub>2</sub> O | 2.29     | <b>5</b>    | NaBr                                 | 42.46    | <b>95</b>    | 5.0   | 44.76  | 180   | 1.6 |
| 14, 34     | H <sub>2</sub> O                | MgBr <sub>2</sub> ·6H <sub>2</sub> O | 0.94     | <b>2</b>    | NaBr                                 | 45.93    | <b>98</b>    | 5.0   | 46.87  | 200   | 1.7 |
| 15         | H <sub>2</sub> O                | MgBr <sub>2</sub> ·6H <sub>2</sub> O | 0.47     | <b>1</b>    | NaBr                                 | 45.73    | <b>99</b>    | 4.8   | 46.20  | 170   | 1.7 |
| 16, 35     | H <sub>2</sub> O                | MgBr <sub>2</sub> ·6H <sub>2</sub> O | 0.23     | <b>0.5</b>  | NaBr                                 | 45.33    | <b>99.5</b>  | 4.7   | 45.56  | 140   | 1.6 |
| 17         | H <sub>2</sub> O                | MgBr <sub>2</sub> ·6H <sub>2</sub> O | 0.12     | <b>0.25</b> | NaBr                                 | 48.25    | <b>99.75</b> | 5.0   | 48.37  |       |     |
| 18         | H <sub>2</sub> O                |                                      |          |             | NaBr                                 | 30.85    | <b>100</b>   | 3.2   | 30.85  |       |     |
| 19, 37, 38 | C <sub>2</sub> H <sub>6</sub> O | MgBr <sub>2</sub> ·6H <sub>2</sub> O | 5.72     | <b>100</b>  |                                      |          |              | 1.7   | 5.72   | 300   | 1.7 |
| 20         | C <sub>2</sub> H <sub>6</sub> O | MgBr <sub>2</sub> ·6H <sub>2</sub> O | 0.51     | <b>86</b>   | NaBr                                 | 0.08     | <b>14</b>    | 0.2   | 0.59   | 170   | 1.6 |
| 21, 39     | C <sub>2</sub> H <sub>6</sub> O | MgBr <sub>2</sub> ·6H <sub>2</sub> O | 1.01     | <b>50</b>   | NaBr                                 | 1.03     | <b>50</b>    | 0.4   | 2.04   | 120   | 1.5 |
| 22, 40     | C <sub>2</sub> H <sub>6</sub> O | MgBr <sub>2</sub> ·6H <sub>2</sub> O | 2.38     | <b>20</b>   | NaBr                                 | 9.49     | <b>80</b>    | 1.7   | 11.86  | 170   | 1.5 |
| 23         | C <sub>2</sub> H <sub>6</sub> O | MgBr <sub>2</sub> ·6H <sub>2</sub> O | 0.36     | <b>10</b>   | NaBr                                 | 3.19     | <b>90</b>    | 0.4   | 3.55   | 120   | 1.5 |
| 24         | C <sub>2</sub> H <sub>6</sub> O | MgBr <sub>2</sub> ·6H <sub>2</sub> O | 0.98     | <b>7.5</b>  | NaBr                                 | 12.20    | <b>92.5</b>  | 1.5   | 13.18  | 150   | 1.5 |
| 25         | C <sub>2</sub> H <sub>6</sub> O | MgBr <sub>2</sub> ·6H <sub>2</sub> O | 0.74     | <b>5</b>    | NaBr                                 | 14.22    | <b>95</b>    | 1.7   | 14.96  |       |     |
| 26, 41     | C <sub>2</sub> H <sub>6</sub> O | MgBr <sub>2</sub> ·6H <sub>2</sub> O | 0.18     | <b>1</b>    | NaBr                                 | 15.84    | <b>99</b>    | 1.7   | 16.02  |       |     |
| 27, 42     | C <sub>2</sub> H <sub>6</sub> O |                                      |          |             | NaBr                                 | 16.20    | <b>100</b>   | 1.7   | 16.20  | 190   | 1.6 |
| 28, 43     | C <sub>2</sub> H <sub>6</sub> O | Pure ethanol                         |          |             |                                      |          |              |       |        |       |     |
| 31         | H <sub>2</sub> O                | MgBr <sub>2</sub> ·6H <sub>2</sub> O | 17.32    | <b>100</b>  |                                      |          |              | 5.1   | 17.32  |       |     |
| 36         | H <sub>2</sub> O                |                                      |          |             | NaBr                                 | 48.61    | <b>100</b>   | 5.0   | 48.61  |       |     |

### References

- [1] W. Pokapanich, N. V. Kryzhevoi, N. Ottosson, S. Svensson, L. S. Cederbaum, G. Öhrwall and O. Björneholm, *Journal of the American Chemical Society*, 2011, **133**, 13430–13436.
- [2] G. Öhrwall, N. Ottosson, W. Pokapanich, S. Legendre, S. Svensson and O. Björneholm, *The Journal of Physical Chemistry B*, 2010, **114**, 17057–17061.
- [3] B. Winter, R. Weber, I. V. Hertel, M. Faubel, P. Jungwirth, E. C. Brown and S. E. Bradforth, *Journal of the American Chemical Society*, 2005, **127**, 7203–7214.
- [4] A. P. Gaiduk, M. Govoni, R. Seidel, J. H. Skone, B. Winter and G. Galli, *Journal of the American Chemical Society*, 2016, **138**, 6912–6915.
